# Supplementary figures and images for: Assessing DNA Degradation through Differential Amplification Efficiency of Total Human and Human Male DNA in a Forensic qPCR Assay
Source: MDPI journal article supplement (doi:10.3390/genes15050622), 2024-05-14

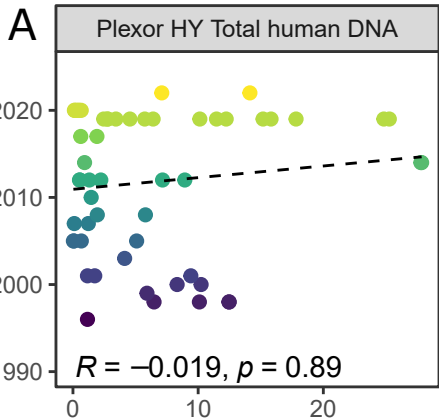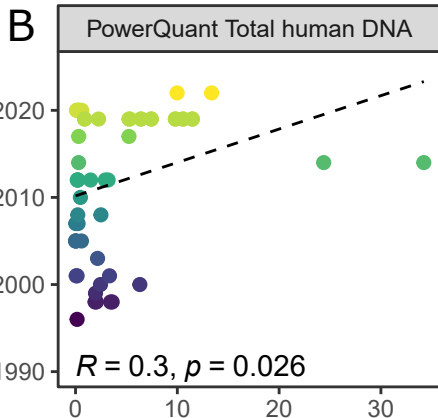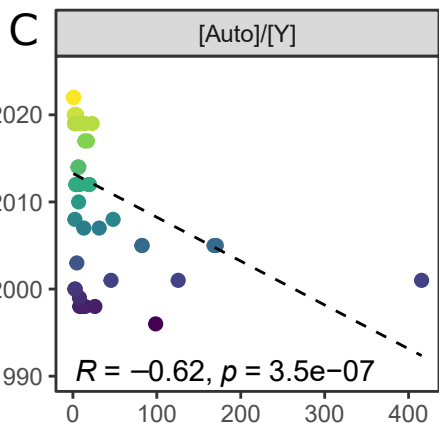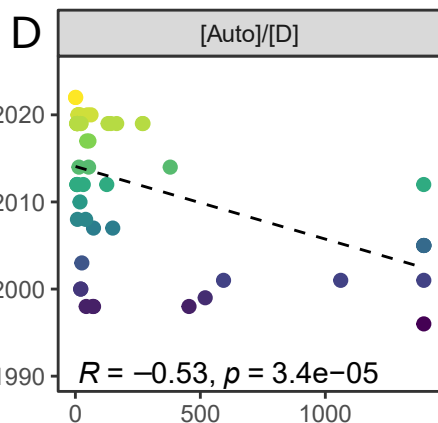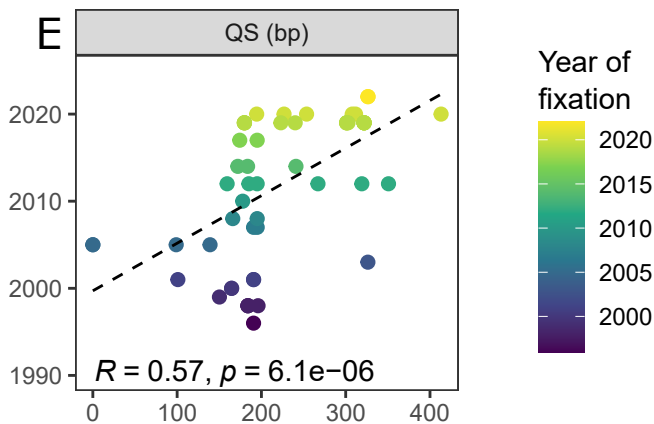

Supplement: s1 [file s1]

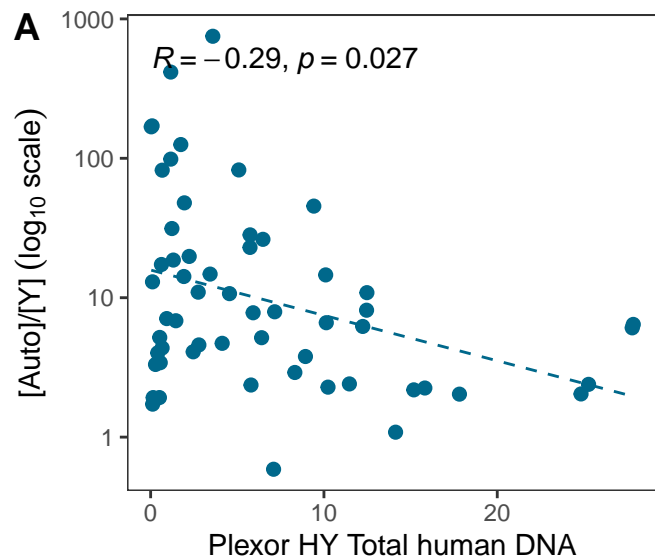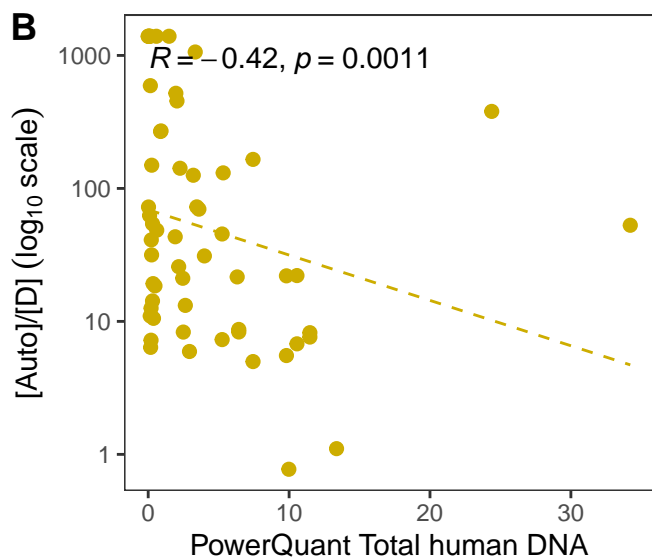

Supplement: s1 [file s1]

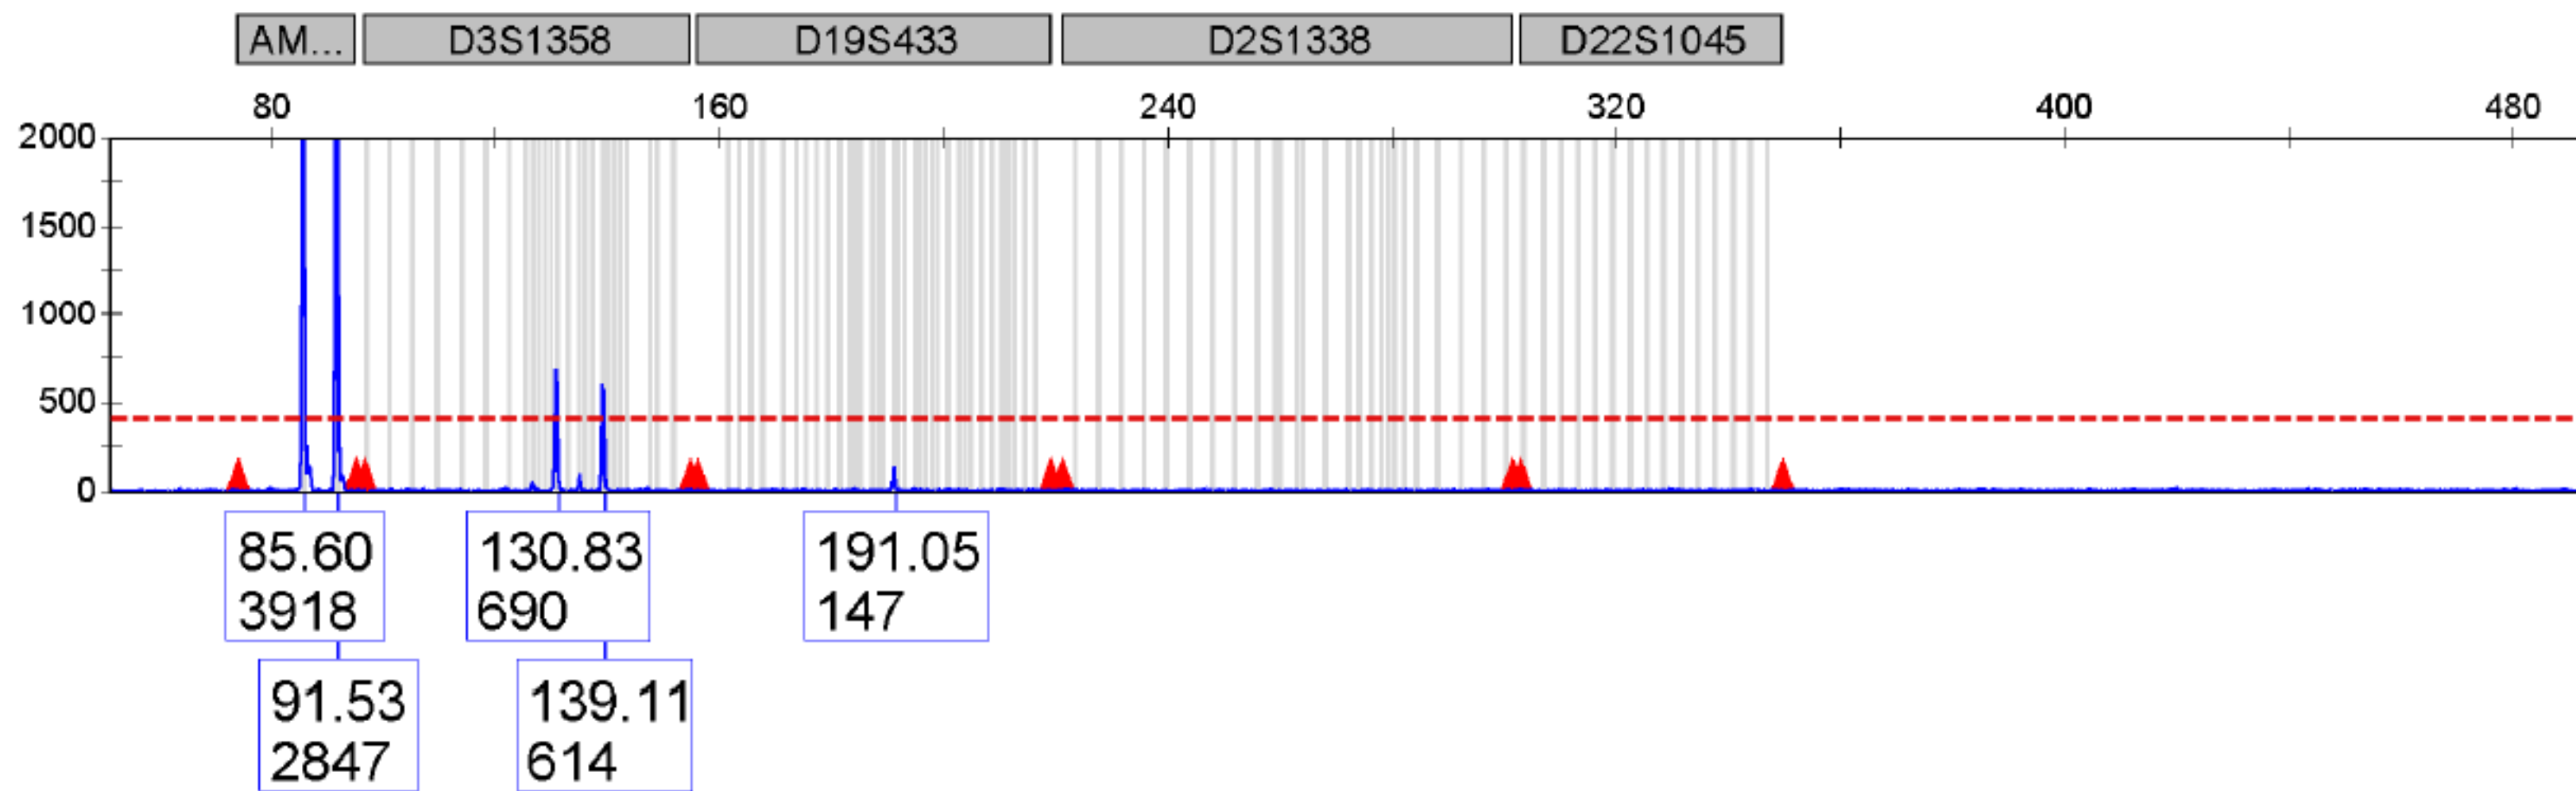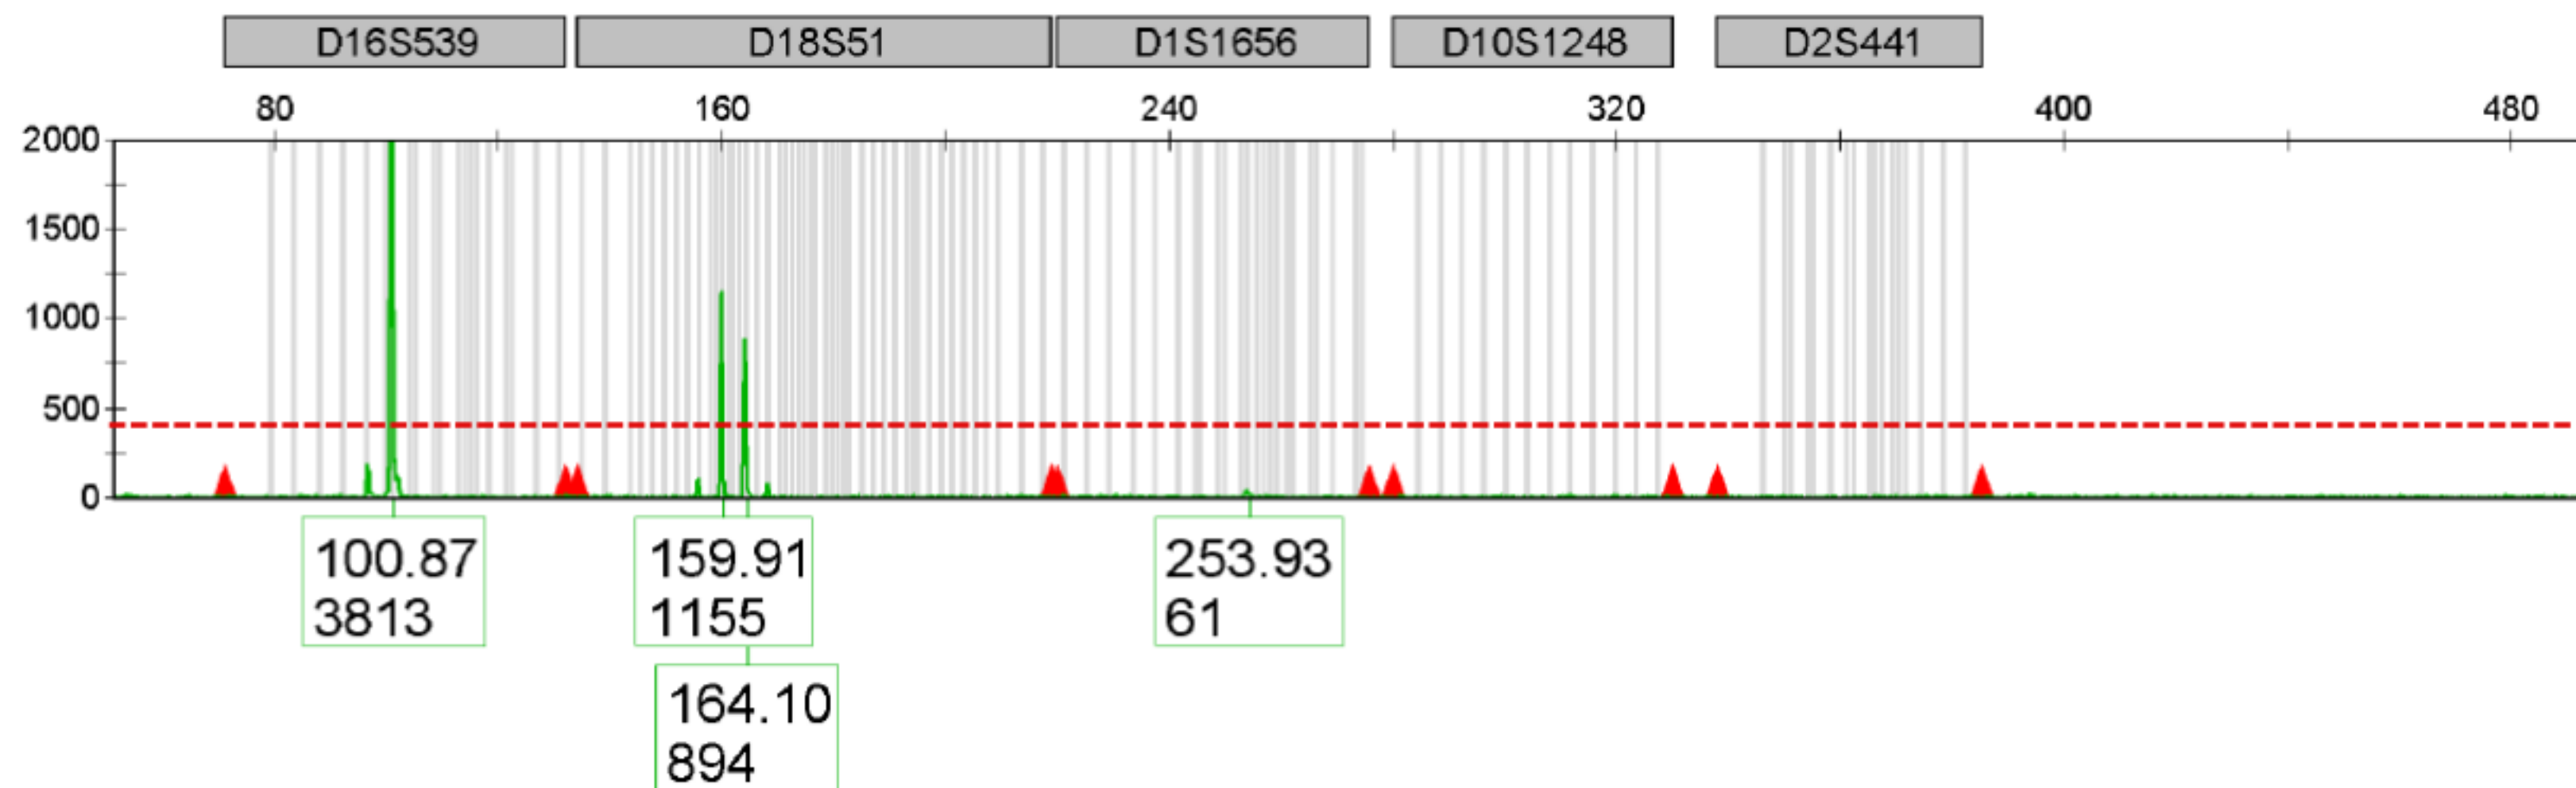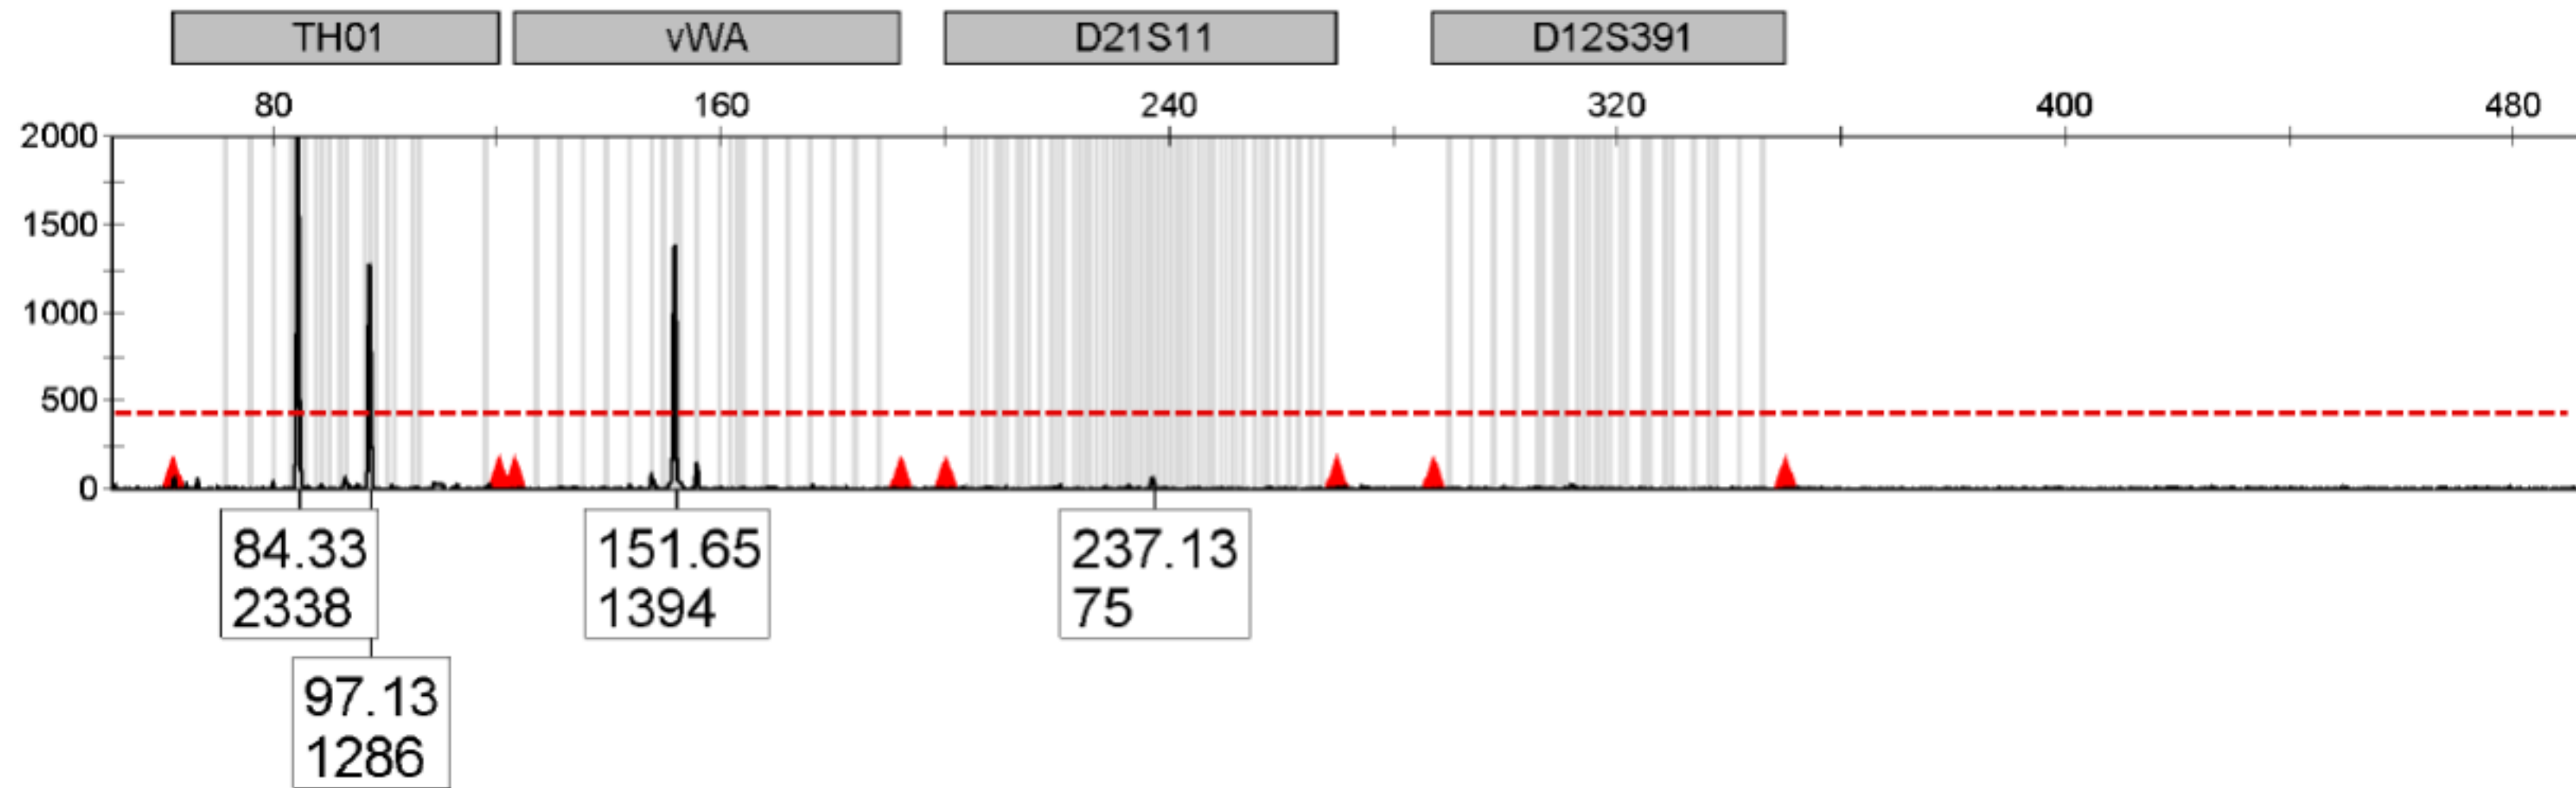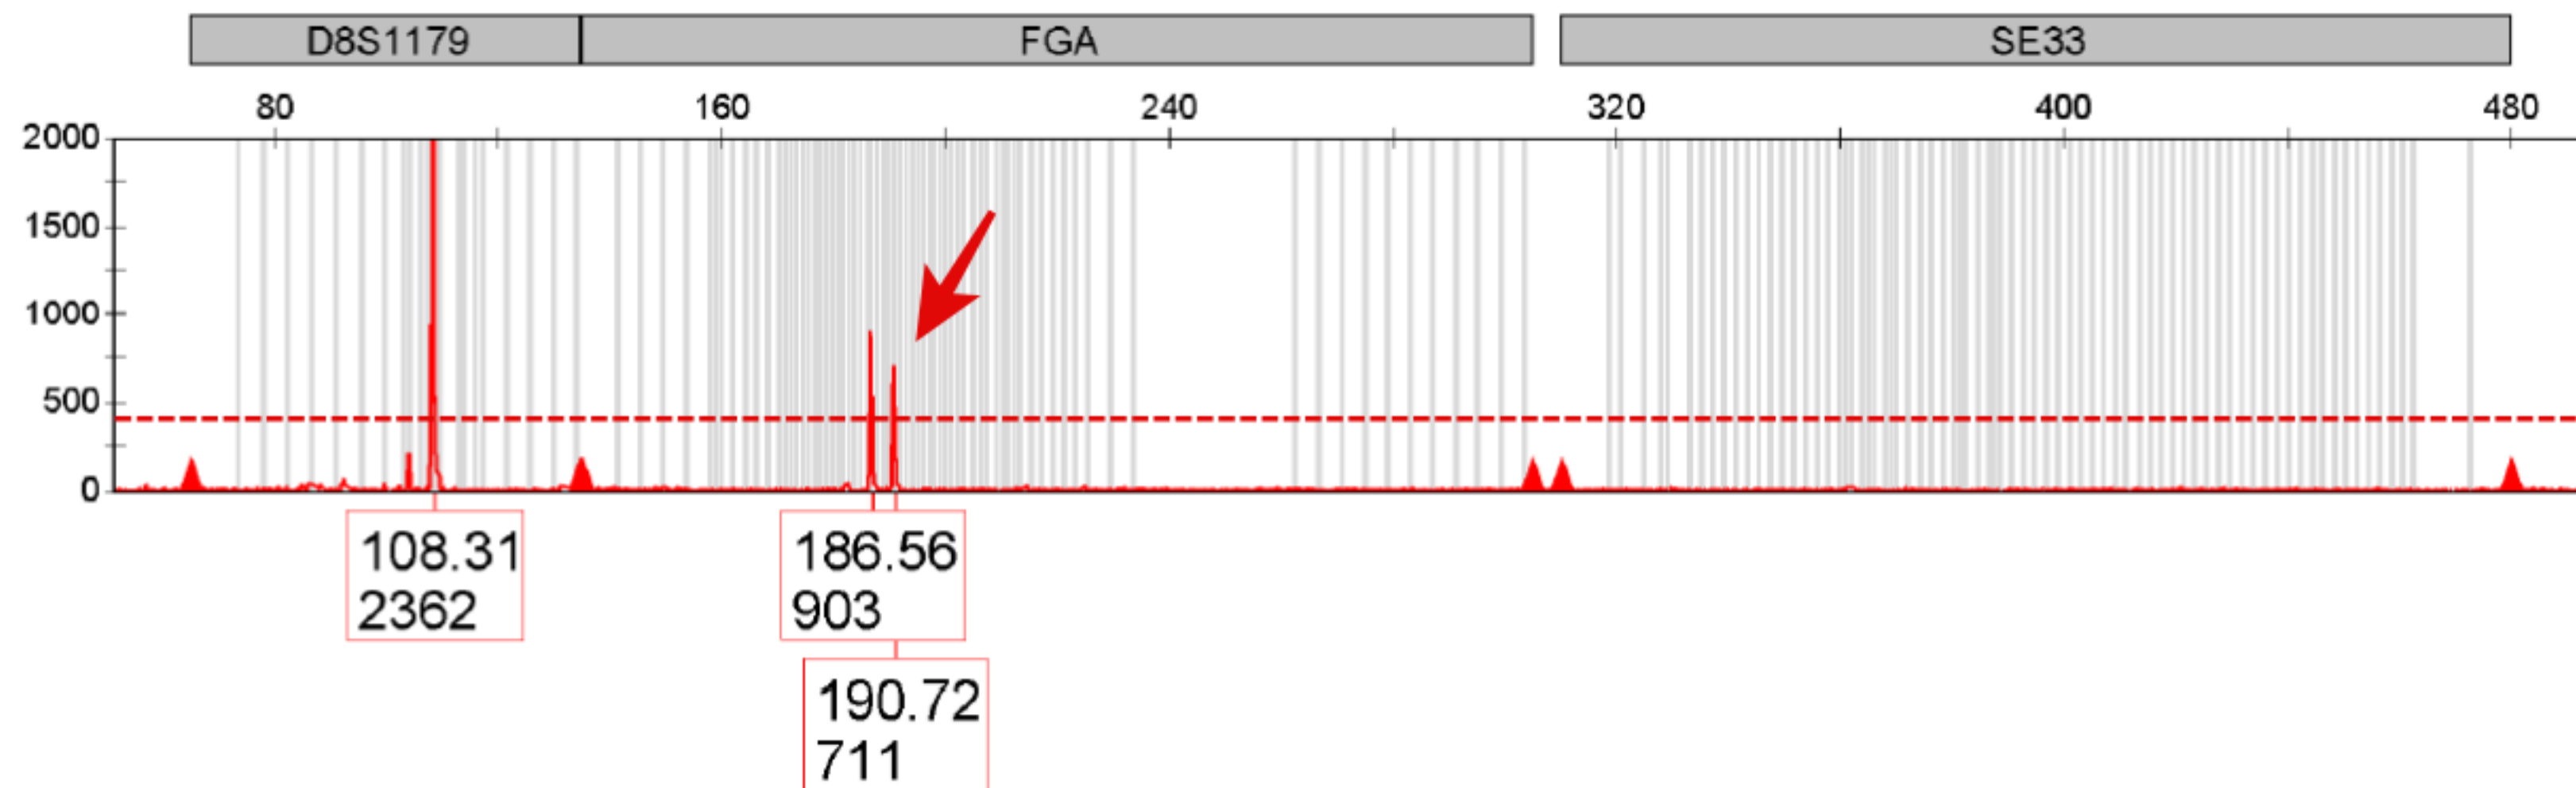

Supplement: s1 [file s1]
